# Supplementary material
Source: PubMed Central journal article supplement (PMC4984641)
Supplement: JVI.00297-16_zjv999181856so1.pdf [file JVI.00297-16_zjv999181856so1.pdf]

**Supplementary Table 1: Frequency of Variant Specific T cell Responses in HSCT patients**

| Patient                               | Evidence of Coinfection | Variant Epitope Sequence | HLA Restriction | Antigen | % IFN- $\gamma^+$ of CD8 <sup>+</sup> T cells |
|---------------------------------------|-------------------------|--------------------------|-----------------|---------|-----------------------------------------------|
| <b>Patients with CMV Reactivation</b> |                         |                          |                 |         |                                               |
| <b>04</b>                             | <b>No</b>               | VLEETSVML                | A2              | IE-1    | 0.52                                          |
|                                       |                         | YILEETSVML               | A2              | IE-1    | 0.18                                          |
|                                       |                         | DELRRKMMY                | B44             | IE-1    | 0.07                                          |
|                                       |                         | DELKRKMIY                | B44             | IE-1    | 0.07                                          |
|                                       |                         | EEAIVAYTL                | B44             | IE-1    | 12.61                                         |
|                                       |                         | EDAIAAYTL                | B44             | IE-1    | 0.52                                          |
|                                       |                         | NLVPMVATV                | A2              | pp65    | 27.38                                         |
|                                       |                         | FMDILTTCV                | A2              | IE-1    | 0.24                                          |
| <b>06</b>                             | <b>No</b>               | AYAQKIFKIL               | A24             | IE-1    | 21.68                                         |
|                                       |                         | TYSQKIFKIL               | A24             | IE-1    | 21.29                                         |
| <b>13</b>                             | <b>No</b>               | VLEETSVML                | A2              | IE-1    | 0.1                                           |
|                                       |                         | YILEETSVML               | A2              | IE-1    | 24.05                                         |
|                                       |                         | DELRRKMMY                | B44             | IE-1    | 3.4                                           |
|                                       |                         | DELKRKMIY                | B44             | IE-1    | 0.05                                          |
|                                       |                         | EEAIVAYTL                | B44             | IE-1    | 0.3                                           |
|                                       |                         | EDAIAAYTL                | B44             | IE-1    | 0.01                                          |
|                                       |                         | NLVPMVATV                | A2              | pp65    | 31.5                                          |
|                                       |                         | FMDILTTCV                | A2              | IE-1    | 9.04                                          |
| <b>14</b>                             | <b>No</b>               | KARAKKDELK               | A31             | IE-1    | 0.08                                          |
|                                       |                         | KARAKKDELK               | A31             | IE-1    | 0                                             |
|                                       |                         | RPHERNGFTVL              | B7              | pp65    | 49.86                                         |
|                                       |                         | TPRVTGGGAM               | B7              | pp65    | 26.65                                         |
| <b>16</b>                             | <b>Yes</b>              | VLEETSVML                | A2              | IE-1    | 0.77                                          |
|                                       |                         | YILEETSVML               | A2              | IE-1    | 0.34                                          |
|                                       |                         | ARAKKDELK                | B27             | IE-1    | 34.53                                         |
|                                       |                         | ARAKKDELK                | B27             | IE-1    | 29.82                                         |
|                                       |                         | KRKMIYMCYR               | B27             | IE-1    | 0.62                                          |
|                                       |                         | RRKMMYMCYR               | B27             | IE-1    | 7.12                                          |
|                                       |                         | NLVPMVATV                | A2              | pp65    | 48.43                                         |
|                                       |                         | FMDILTTCV                | A2              | IE-1    | 3.69                                          |
| <b>17</b>                             | <b>Yes</b>              | ELRRKMMYM                | B8              | IE-1    | 0.77                                          |
|                                       |                         | ELKRKMIYM                | B8              | IE-1    | 32.07                                         |
|                                       |                         | VTEHDTLLY                | A1              | pp50    | 16.55                                         |
|                                       |                         | QIKVRVDMV                | B8              | IE-1    | 1.81                                          |
| <b>19</b>                             | <b>Yes</b>              | VLEETSVML                | A2              | IE-1    | *                                             |
|                                       |                         | YILEETSVML               | A2              | IE-1    | *                                             |
|                                       |                         | DELRRKMMY                | B44             | IE-1    | *                                             |

|    |     |            |     |      |        |
|----|-----|------------|-----|------|--------|
|    |     | DELKRKMIY  | B44 | IE-1 | *      |
|    |     | EEAIVAYTL  | B44 | IE-1 | *      |
|    |     | EDAIAAYTL  | B44 | IE-1 | *      |
|    |     | NLVPMVATV  | A2  | pp65 | *      |
|    |     | FMDILTTCV  | A2  | IE-1 | *      |
| 25 | Yes | VLEETSVML  | A2  | IE-1 | 0.22   |
|    |     | YILEETSVML | A2  | IE-1 | 1.37   |
|    |     | NLVPMVATV  | A2  | pp65 | 29.309 |
|    |     | FMDILTTCV  | A2  | IE-1 | 0.32   |
| 26 | No  | VLEETSVML  | A2  | IE-1 | 0      |
|    |     | YILEETSVML | A2  | IE-1 | 0      |
|    |     | NLVPMVATV  | A2  | pp65 | 0      |
|    |     | FMDILTTCV  | A2  | IE-1 | 2.69   |
| 28 | Yes | VLEETSVML  | A2  | IE-1 | 8.83   |
|    |     | YILEETSVML | A2  | IE-1 | 8.53   |
|    |     | DELRRKMMY  | B44 | IE-1 | 2.56   |
|    |     | DELKRKMIY  | B44 | IE-1 | 3      |
|    |     | EEAIVAYTL  | B44 | IE-1 | 2.82   |
|    |     | EDAIAAYTL  | B44 | IE-1 | 3.51   |
|    |     | NLVPMVATV  | A2  | pp65 | 7.09   |
|    |     | FMDILTTCV  | A2  | IE-1 | 13.4   |
| 30 | No  | YILEETSVML | A2  | IE-1 | 49.91  |
|    |     | VLEETSVML  | A2  | IE-1 | 46.51  |
|    |     | NLVPMVATV  | A2  | pp65 | 57.39  |
|    |     | FMDILTTCV  | A2  | IE-1 | 0.55   |
| 32 | Yes | YILEETSVML | A2  | IE-1 | 1.48   |
|    |     | VLEETSVML  | A2  | IE-1 | 0.39   |
|    |     | NLVPMVATV  | A2  | pp65 | 0.43   |
|    |     | FMDILTTCV  | A2  | IE-1 | 26.54  |
| 34 | Yes | ELRRKMMYM  | B8  | IE-1 | 18.85  |
|    |     | ELKRKMIYM  | B8  | IE-1 | 13.04  |
|    |     | VTEHDTLLY  | A1  | pp50 | 22.54  |
|    |     | QIKVRVDMV  | B8  | IE-1 | 19.39  |
| 38 | Yes | VTEHDTLLY  | A1  | pp50 | 83.72  |
| 39 | Yes | VLEETSVML  | A2  | IE-1 | 0      |
|    |     | YILEETSVML | A2  | IE-1 | 0      |
|    |     | DELRRKMMY  | B44 | IE-1 | 0.26   |
|    |     | DELKRKMIY  | B44 | IE-1 | 0      |
|    |     | EEAIVAYTL  | B44 | IE-1 | 0.18   |
|    |     | EDAIAAYTL  | B44 | IE-1 | 0      |
|    |     | NLVPMVATV  | A2  | pp65 | 1.8    |
|    |     | FMDILTTCV  | A2  | IE-1 | 18.48  |

|                                          |      |             |     |      |       |
|------------------------------------------|------|-------------|-----|------|-------|
| 44                                       | Yes  | VLEETSVML   | A2  | IE-1 | 1.57  |
|                                          |      | YILEETSVML  | A2  | IE-1 | 5.3   |
|                                          |      | DELRRKMMY   | B44 | IE-1 | 28.62 |
|                                          |      | DELKRKMIY   | B44 | IE-1 | 6.67  |
|                                          |      | EDAIAAYTL   | B44 | IE-1 | 2.24  |
|                                          |      | EEAIVAYTL   | B44 | IE-1 | 13.5  |
|                                          |      | NLVPMVATV   | A2  | pp65 | 59.84 |
| 46                                       | Yes  | VLEETSVML   | A2  | IE-1 | 8.55  |
|                                          |      | YILEETSVML  | A2  | IE-1 | 4.3   |
|                                          |      | DELRRKMMY   | B44 | IE-1 | 6.81  |
|                                          |      | DELKRKMIY   | B44 | IE-1 | 2.63  |
|                                          |      | EDAIAAYTL   | B44 | IE-1 | 0.71  |
|                                          |      | EEAIVAYTL   | B44 | IE-1 | 1.38  |
|                                          |      | NLVPMVATV   | A2  | pp65 | 54.79 |
|                                          |      | FMDILTTCV   | A2  | IE-1 | 15.12 |
| <b>Patients without CMV Reactivation</b> |      |             |     |      |       |
| 1                                        | N.A. | ARAKKDELK   | B27 | IE-1 | 0     |
|                                          |      | ARAKKDELR   | B27 | IE-1 | 0.76  |
|                                          |      | KRKMIYMCYR  | B27 | IE-1 | 15.29 |
|                                          |      | RRKMMYMCYR  | B27 | IE-1 | 9.14  |
|                                          |      | VTEHDTLLY   | A1  | pp50 | 33.45 |
|                                          |      | YSEHPTFTSQY | A1  | pp65 | 47.34 |
| 07                                       | N.A. | VLEETSVML   | A2  | IE-1 | 0.31  |
|                                          |      | YILEETSVML  | A2  | IE-1 | 0.61  |
|                                          |      | ELRRKMMYM   | B8  | IE-1 | 15.74 |
|                                          |      | ELKRKMIYM   | B8  | IE-1 | 5.91  |
|                                          |      | VTEHDTLLY   | A1  | pp50 | 3.02  |
|                                          |      | NLVPMVATV   | A2  | pp65 | 25.23 |
|                                          |      | FMDILTTCV   | A2  | IE-1 | 0     |
| 15                                       | N.A. | KARAKKDELR  | A31 | IE-1 | 0.09  |
|                                          |      | KARAKKDELK  | A31 | IE-1 | 0.52  |
|                                          |      | RPHERNGFTVL | B7  | pp65 | 18.79 |
|                                          |      | TPRVTGGGAM  | B7  | pp65 | 58.62 |
| 36                                       | N.A. | VLEETSVML   | A2  | IE-1 | 0     |
|                                          |      | YILEETSVML  | A2  | IE-1 | 0.13  |
|                                          |      | NLVPMVATV   | A2  | pp50 | 1.03  |
|                                          |      | FMDILTTCV   | A2  | IE-1 | 2     |
| 37                                       | N.A. | ELRRKMMYM   | B8  | IE-1 | 33.84 |
|                                          |      | ELKRKMIYM   | B8  | IE-1 | 32.39 |
|                                          |      | VTEHDTLLY   | A1  | pp50 | 43.16 |
|                                          |      | QIKVRVDMV   | B8  | IE-1 | 37.36 |
| 42                                       | N.A. | VLEETSVML   | A2  | IE-1 | 0.68  |
|                                          |      | YILEETSVML  | A2  | IE-1 | 5.65  |

|           |             |             |     |      |       |
|-----------|-------------|-------------|-----|------|-------|
|           |             | AYAQKIFKIL  | A24 | IE-1 | 0     |
|           |             | TYSQKIFKIL  | A24 | IE-1 | 10.26 |
|           |             | DELRRKMMY   | B44 | IE-1 | 1.62  |
|           |             | DELKRKMIY   | B44 | IE-1 | 0.41  |
|           |             | EEAIVAYTL   | B44 | IE-1 | 1.27  |
|           |             | EDAIAAYTL   | B44 | IE-1 | 0.25  |
|           |             | NLVPMVATV   | A2  | pp65 | 56.11 |
|           |             | FMDILTTCV   | A2  | IE-1 | 1.24  |
| <b>43</b> | <b>N.A.</b> | DELRRKMMY   | B44 | IE-1 | 0     |
|           |             | DELKRKMIY   | B44 | IE-1 | 0     |
|           |             | EEAIVAYTL   | B44 | IE-1 | 0     |
|           |             | EDAIAAYTL   | B44 | IE-1 | 0     |
|           |             | VTEHDTLLY   | A1  | pp50 | 49.31 |
|           |             | YSEHPTFTSQY | A!  | pp65 | 44.4  |
| <b>45</b> | <b>N.A.</b> | VLEETSVML   | A2  | IE-1 | 0     |
|           |             | YILEETSVML  | A2  | IE-1 | 0     |
|           |             | DELRRKMMY   | B44 | IE-1 | 0.03  |
|           |             | DELKRKMIY   | B44 | IE-1 | 0     |
|           |             | EEAIVAYTL   | B44 | IE-1 | 0     |
|           |             | EDAIAAYTL   | B44 | IE-1 | 0     |
|           |             | NLVPMVATV   | A2  | pp65 | 29.55 |
|           |             | FMDILTTCV   | A2  | IE-1 | 1.24  |
| <b>47</b> | <b>N.A.</b> | VLEETSVML   | A2  | IE-1 | 11.57 |
|           |             | YILEETSVML  | A2  | IE-1 | 20.54 |
|           |             | DELRRKMMY   | B44 | IE-1 | 0     |
|           |             | DELKRKMIY   | B44 | IE-1 | 0     |
|           |             | EEAIVAYTL   | B44 | IE-1 | 0     |
|           |             | EDAIAAYTL   | B44 | IE-1 | 0     |
|           |             | NLVPMVATV   | A2  | pp65 | 15.83 |
|           |             | FMDILTTCV   | A2  | IE-1 | 3.41  |

Shaded boxes represent the variant sequences detected in the corresponding patients

\* T cells failed to survive in culture

**N.A.** Not Applicable
